# Supplementary material
Source: PubMed Central journal article supplement (PMC7541415)
Supplement: NIHMS1580117-supplement-1.pdf [file NIHMS1580117-supplement-1.pdf]

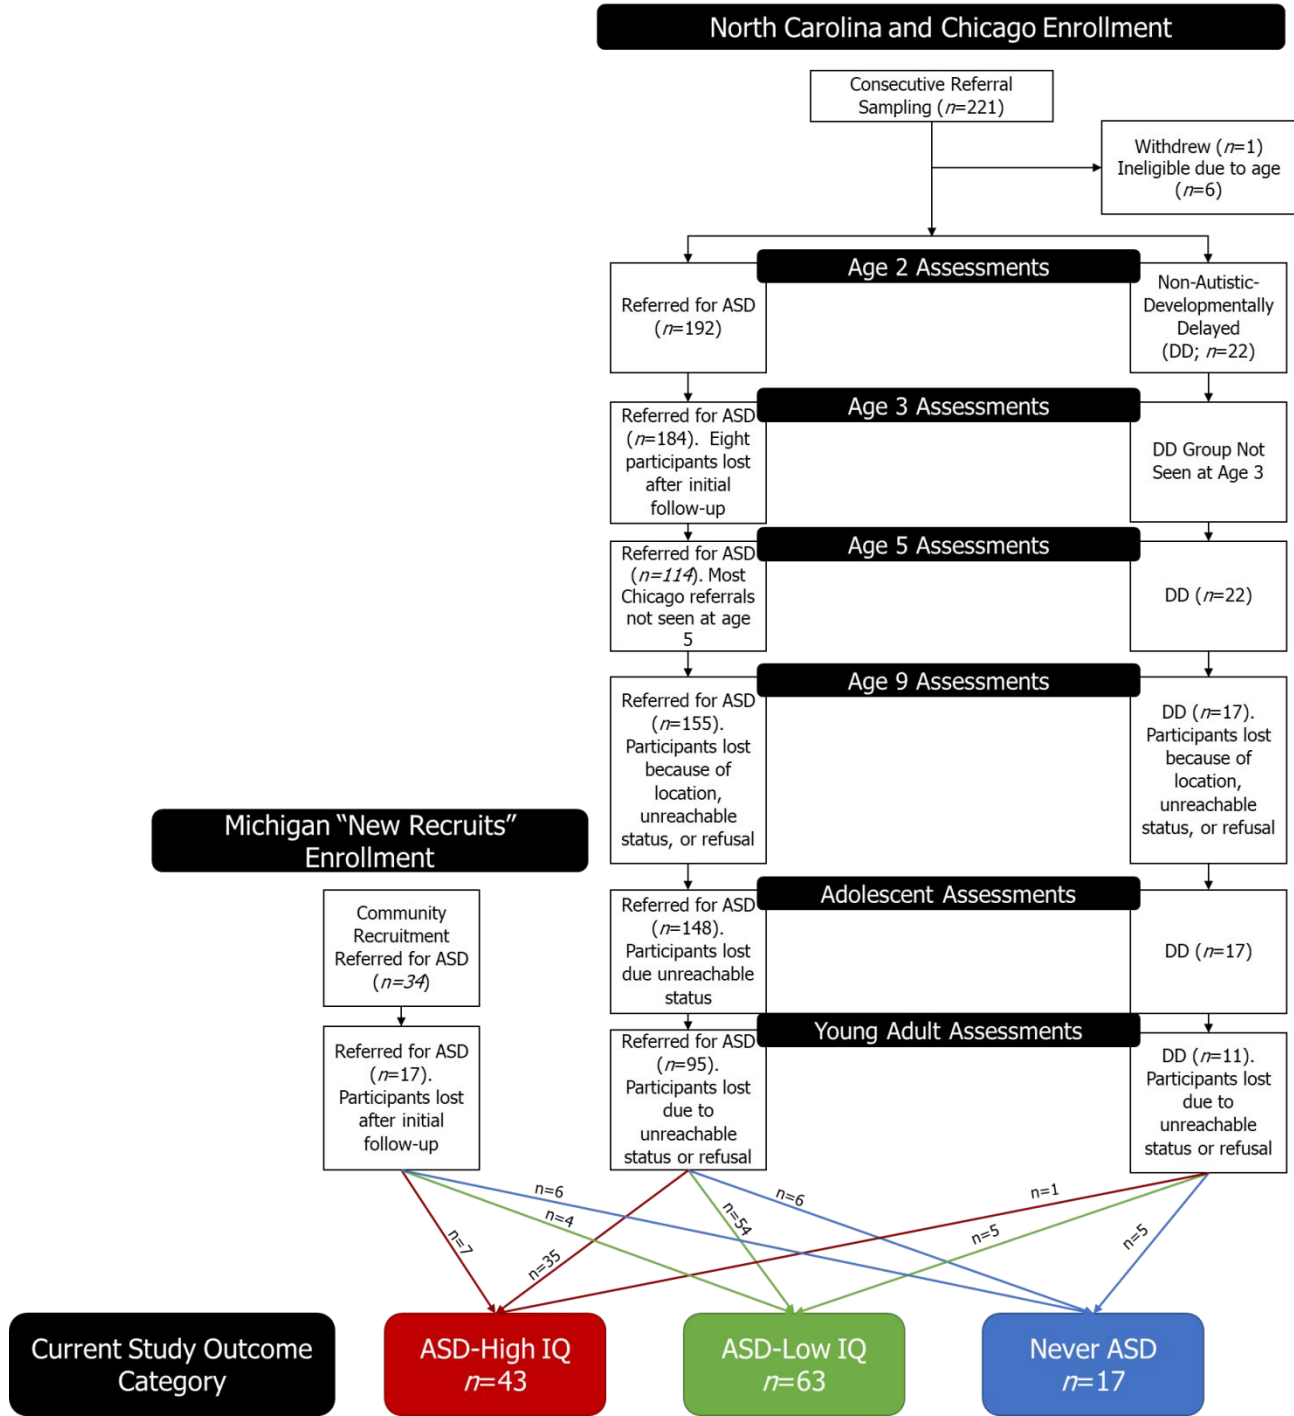

**Figure 1S: Consort Diagram of Participant Recruitment.** Participants were drawn from three sources of children referred for possible autism or with developmental delays: care centers in North Carolina, Chicago and Michigan (who were recruited in later childhood).
